# Supplementary material for: Experimental Cowpox Virus (CPXV) Infections of Bank Voles: Exceptional Clinical Resistance and Variable Reservoir Competence
Source: PubMed Central journal article supplement (PMC5744165; doi:10.3390/v9120391), 2017-12-19
Supplement: viruses-09-00391-s001.pdf [file viruses-09-00391-s001.pdf]

## Supplemental material:

**Table S1**

Detection and titration of OPV-specific antibodies in vole sera taken at 21 dpi (intranasal inoculation)

| CPXV strain   | Antibody titers (No. of positive/total no. of tested voles)* |     |     |     |     |
|---------------|--------------------------------------------------------------|-----|-----|-----|-----|
|               | 20                                                           | 40  | 80  | 160 | 320 |
| Brighton Red  | 4/4                                                          | 4/4 | 4/4 | 3/4 | 0/4 |
| FIN_MAN_2000  | 6/6                                                          | 6/6 | 5/6 | 5/6 | 1/6 |
| RatPox09      | 4/5                                                          | 2/5 | 1/5 | 1/5 | 0/5 |
| Ger 91/3      | 4/6                                                          | 4/6 | 0/6 | 0/6 | 0/6 |
| Ger/2007/Vole | 1/5                                                          | 0/5 | 0/5 | 0/5 | 0/5 |
| FM2292        | 4/5                                                          | 3/5 | 3/5 | 1/5 | 0/5 |
| Ger/2010/Cat  | 2/3                                                          | 2/3 | 2/3 | 1/3 | 0/3 |

\*Antibody titers of  $\geq 40$  were considered positive.

**Table S2**

Antibody titers in bank voles inoculated with CPXV via different routes and in contact animals at 14 dpi

| CPXV RatPox09 |                 | Antibody titers (no. of positive/total no. of animals tested)* |     |     |     |     |
|---------------|-----------------|----------------------------------------------------------------|-----|-----|-----|-----|
|               |                 | 20                                                             | 40  | 80  | 160 | 320 |
| Subcutaneous  | Inoculated      | 4/6                                                            | 3/6 | 2/6 | 1/6 | 1/6 |
|               | Contact animals | 0/1                                                            | 0/1 | 0/1 | 0/1 | 0/1 |
| Intranasal    | Inoculated      | 5/6                                                            | 5/6 | 5/6 | 5/6 | 5/6 |
|               | Contact animals | 1/2                                                            | 1/2 | 1/2 | 1/2 | 1/2 |

\*Antibody titers of  $\geq 40$  were considered positive.

**Table S3**

Antibody titers in 4-weeks old bank voles from Western and Carpathian lineage inoculated with CPXV RatPox09 at 14 dpi

| Intranasal inoculation with CPXV RatPox09 |                 | Antibody titers (no. of positive/total no. of animals tested)* |     |
|-------------------------------------------|-----------------|----------------------------------------------------------------|-----|
|                                           |                 | 20                                                             | 80  |
| Western lineage                           | Inoculated      | 5/5                                                            | 1/5 |
|                                           | Contact animals | 0/3                                                            | 0/3 |
| Carpathian lineage                        | Inoculated      | 6/6                                                            | 1/6 |
|                                           | Contact animals | 0/3                                                            | 0/3 |

\*Antibody titers of  $\geq 40$  were considered positive.

**Table S4**

Antibody titers in bank voles inoculated via the footpad method with either CPXV RatPox09 or CPXV FM2292 (28 dpi)

| Footpad inoculation |                 | Antibody titers (no. of positive/total no. of voles tested)* |       |       |      |      |
|---------------------|-----------------|--------------------------------------------------------------|-------|-------|------|------|
|                     |                 | 20                                                           | 40    | 80    | 160  | 320  |
| CPXV<br>RatPox09    | Inoculated      | 11/12                                                        | 8/12  | 6/12  | 4/12 | 1/12 |
|                     | Contact animals | 0/4                                                          | 0/4   | 0/4   | 0/4  | 0/4  |
| CPXV<br>FM2292      | Inoculated      | 11/12                                                        | 11/12 | 10/12 | 7/12 | 1/12 |
|                     | Contact animals | 1/6                                                          | 1/6   | 1/6   | 1/6  | 1/6  |

\*Antibody titers of  $\geq 40$  were considered positive.

**Table S5**

Antibody titers of bank voles repeatedly inoculated with the same CPXV strain at 42 dpi

| <b>Intranasal inoculation<br/>with booster</b> | <b>Antibody titers (no. of positive/total no. of voles tested)*</b> |           |           |            |            |
|------------------------------------------------|---------------------------------------------------------------------|-----------|-----------|------------|------------|
|                                                | <b>20</b>                                                           | <b>40</b> | <b>80</b> | <b>160</b> | <b>320</b> |
| <b>CPXV Brighton Red</b>                       | 6/6                                                                 | 6/6       | 6/6       | 6/6        | 6/6        |
| <b>CPXV FM2292</b>                             | 6/6                                                                 | 6/6       | 6/6       | 6/6        | 1/6        |
| <b>CPXV RatPox09</b>                           | 3/6                                                                 | 3/6       | 3/6       | 3/6        | 1/6        |

\*Antibody titers of  $\geq 40$  were considered positive.
